# Supplementary material for: Robust ionic liquid@MOF composite as a versatile superprotonic conductor
Source: Royal Society of Chemistry journal article supplement (doi:10.1039/d1dt02877d), 2021-01-01
Supplement: d1dt02877d1.pdf [file d1dt02877d1.pdf]

## Supporting Information

# Robust Ionic liquid@MOF composite as a versatile superprotonic conductor

Kiran Taksande,<sup>a, b</sup> Effrosyni Gkaniatsou,<sup>c</sup> Corine Simonnet-Jégat,<sup>c</sup> Carine Livage,<sup>c</sup>

Guillaume Maurin,<sup>a</sup> Nathalie Steunou,<sup>c</sup> Sabine Devautour-Vinot,<sup>a</sup>

<sup>a</sup> ICGM, University of Montpellier, CNRS, ENSCM, Montpellier, France

<sup>b</sup> Government of Maharashtra's, Ismail Yusuf College, Jogeshwari(E), Mumbai,  
Maharashtra 411060, India

<sup>c</sup> Institut Lavoisier de Versailles UMR CNRS 8180, Université de Versailles St  
Quentin en Yvelines, Université Paris Saclay, Versailles, France

|                                          |      |
|------------------------------------------|------|
| <b>SEM-EDX</b>                           | p 2  |
| <b>Elemental Analysis</b>                | p 3  |
| <b>Thermogravimetric analysis (TGA)</b>  | p 4  |
| <b>FT-IR spectroscopy</b>                | p 5  |
| <b>Impedance measurements</b>            | p 6  |
| <b>Water sorption isotherm</b>           | p 10 |
| <b>Additional impedance measurements</b> | p11  |

## SEM-EDX

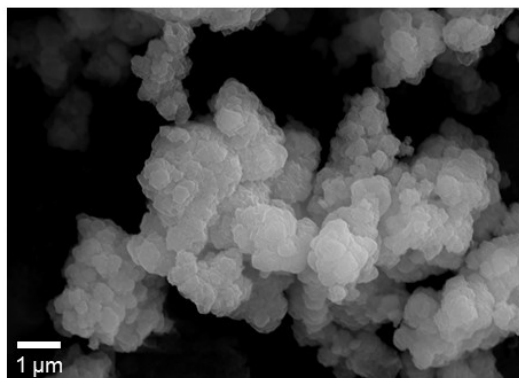

**Figure S1:** SEM image of MIL-101(Cr)-SO<sub>3</sub>H

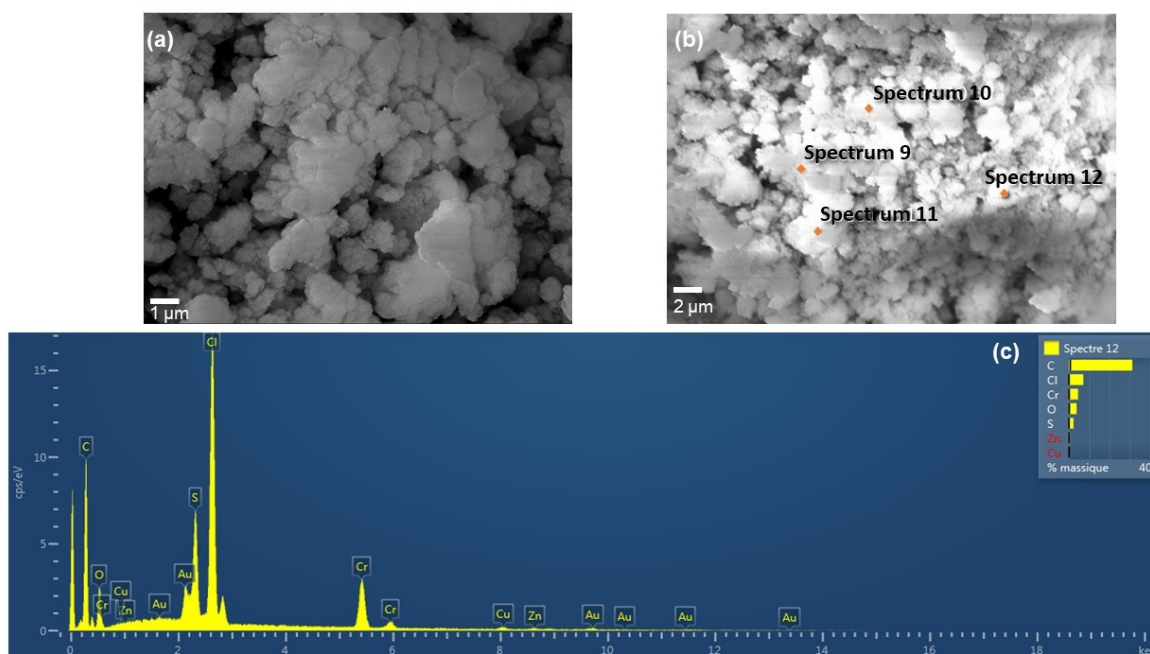

**Figure S2.** (a and b) SEM images of EMIM@MIL-101-SO<sub>3</sub>H and (c) XEDS spectrum of EMIM@MIL-101-SO<sub>3</sub>H in the case of (b).

**Elemental Analysis****Table S1.** EA results of MIL-101(Cr)-SO<sub>3</sub>H and EMIM@MIL-101-SO<sub>3</sub>H.

| <i>MIL-101(Cr)-SO<sub>3</sub>H</i>                                                             |                   |                                                                                       |
|------------------------------------------------------------------------------------------------|-------------------|---------------------------------------------------------------------------------------|
|                                                                                                | <b>%exp (wt%)</b> |                                                                                       |
| <b>C</b>                                                                                       | 27.93             | Weight ratio, m(C)/m(S) = 4.34<br>-SO <sub>3</sub> H functionalization degree= 68.6 % |
| <b>S</b>                                                                                       | 6.43              |                                                                                       |
| <i>EMIM@MIL-101-SO<sub>3</sub>H before PC measurements</i>                                     |                   |                                                                                       |
|                                                                                                | <b>%exp (wt%)</b> |                                                                                       |
| <b>C</b>                                                                                       | 34.7              | Weight ratio, m(C)/m(N) = 3.61                                                        |
| <b>N</b>                                                                                       | 9.6               |                                                                                       |
| <i>EMIM@MIL-101-SO<sub>3</sub>H after PC measurements recorded at 298K-473K / 0% RH</i>        |                   |                                                                                       |
|                                                                                                | <b>%exp (wt%)</b> |                                                                                       |
| <b>C</b>                                                                                       | 37.4              | Weight ratio, m(C)/m(N) = 3.66                                                        |
| <b>N</b>                                                                                       | 10.2              |                                                                                       |
| <i>EMIM@MIL-101-SO<sub>3</sub>H after PC measurements recorded at 343K / 80% RH for 6 days</i> |                   |                                                                                       |
|                                                                                                | <b>%exp (wt%)</b> |                                                                                       |
| <b>C</b>                                                                                       | 35.6              | Weight ratio, m(C)/m(N) = 3.67                                                        |
| <b>N</b>                                                                                       | 9.7               |                                                                                       |

### Thermogravimetric analysis (TGA)

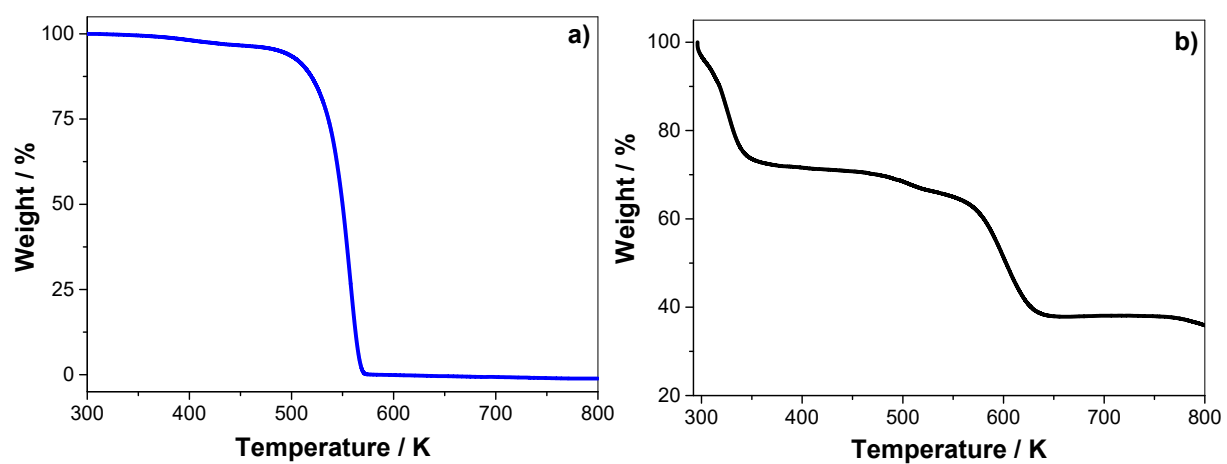

**Figure S3** TGA curve (wt %) of (a) bulk EMIMCl and (b) MIL-101(Cr)-SO<sub>3</sub>H.

## FT-IR spectroscopy

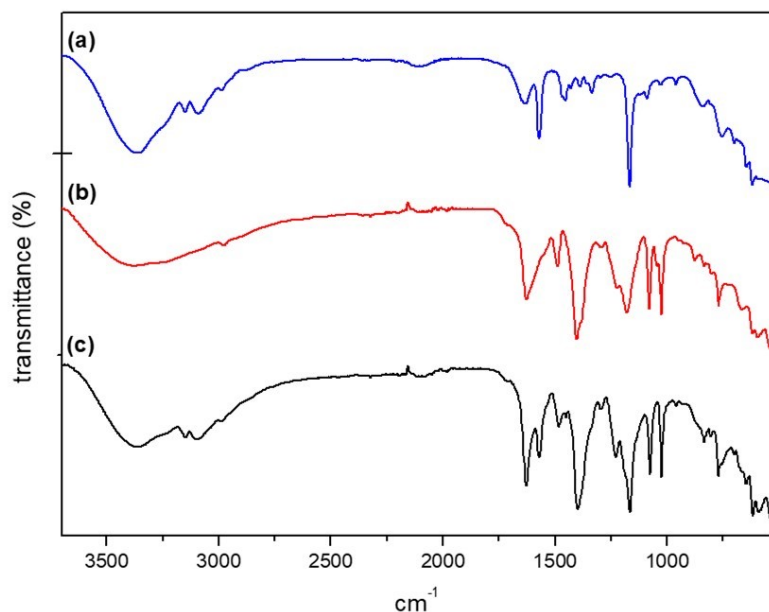

**Figure S4:** FT-IR spectra of (a) EMIMCl, (b) MIL-101(Cr)-SO<sub>3</sub>H and (c) EMIM@MIL-101-SO<sub>3</sub>H.

**Table S2:** Main FT-IR vibration bands of EMIMCl, MIL-101(Cr)-SO<sub>3</sub>H and EMIM@MIL-101-SO<sub>3</sub>H with the corresponding assignment.

| MIL-101(Cr)-SO <sub>3</sub> H | EMIMCl | EMIM@MIL-101-SO <sub>3</sub> H | Assignment                    |
|-------------------------------|--------|--------------------------------|-------------------------------|
|                               | 3151   | 3148                           | v(C-H)                        |
|                               | 3083   | 3088                           | v(C-H)                        |
| 1628                          | 1630   | 1628                           | v(C-O) as + δ(H-O-H)          |
|                               | 1574   | 1568                           | Imidazole skeleton            |
| 1485                          |        | 1479                           | v(C-O)s                       |
|                               | 1448   | 1450                           | Imidazole skeleton            |
| 1403                          |        | 1397                           | v(S=O) as                     |
|                               | 1330   |                                | Imidazole skeleton            |
| 1178                          | 1167   | 1166                           | v(S=O) s + Imidazole skeleton |
| 1077                          |        | 1077                           | v(S-O)                        |
| 1026                          |        | 1026                           | v(S-O)                        |
| 840                           |        | 840                            | v(Cr-O)                       |
| 773                           |        | 773                            | v(C-S)                        |

## Impedance measurements of the anhydrous EMIM@MIL-101-SO<sub>3</sub>H

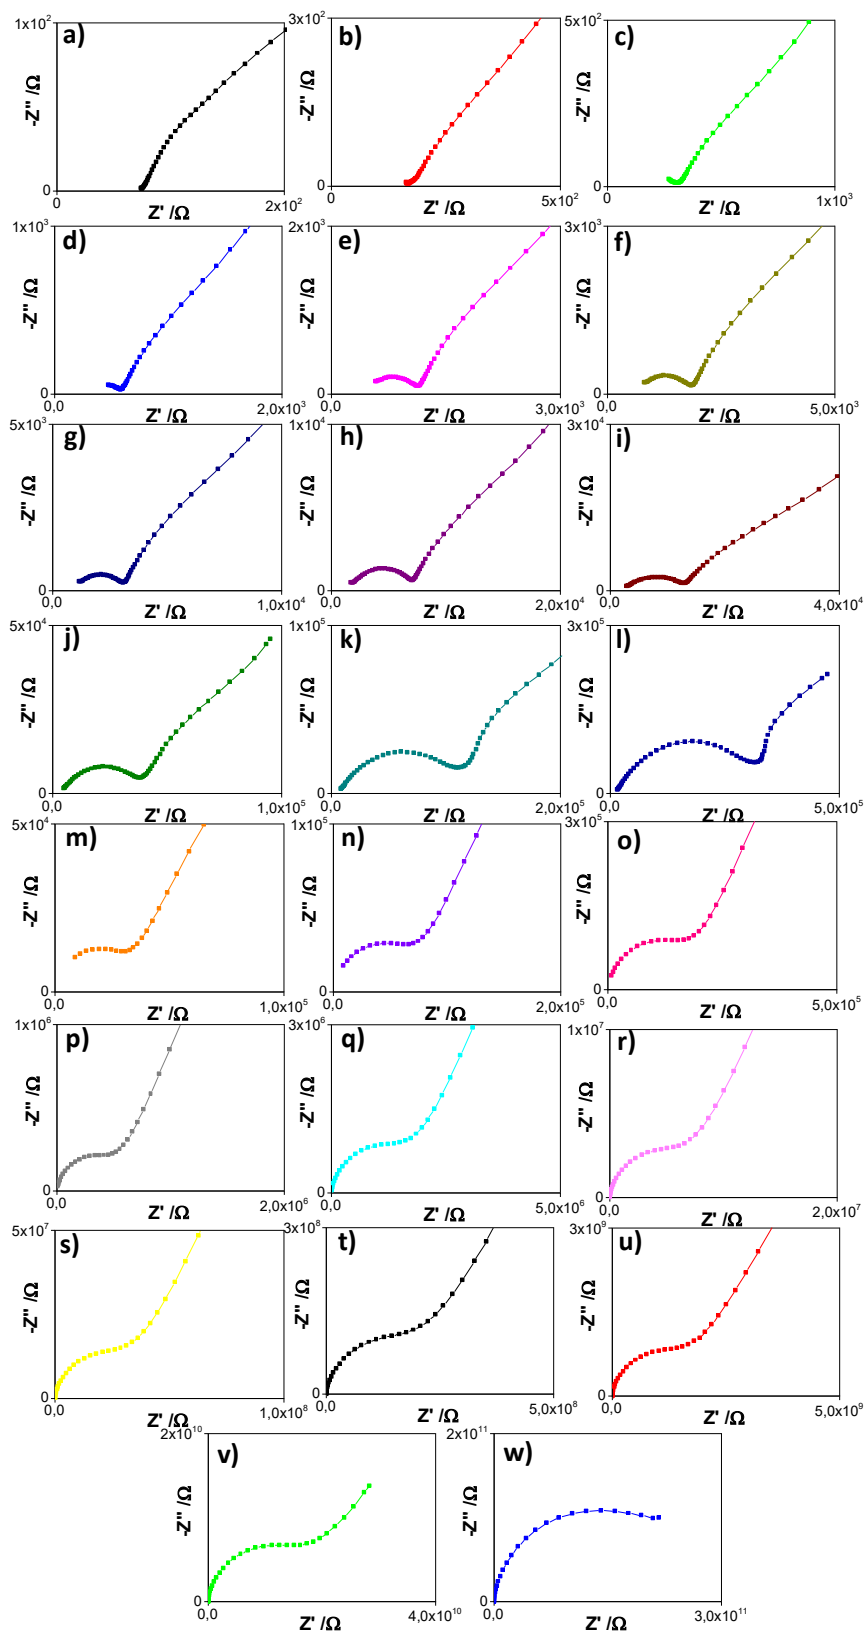

**Figure S5:** Nyquist plots of the impedance for the dehydrated EMIM@MIL-101-SO<sub>3</sub>H powder recorded under 0% RH, at 473 K (a), 463 K (b), 453 K (c), 443 K (d), 433 K (e), 423 K (f), 413 K (g), 403 K (h), 393 K (i), 383 K (j), 373 K (k), 363 K (l), 353 K (m), 343 K (n), 333 K (o), 323 K (p), 313 K (q), 303 K (r), 293 K (s), 283 K (t), 273 K (u), 263 K (v) and 253 K (w).

### Impedance measurements of the bulk EMIMCl

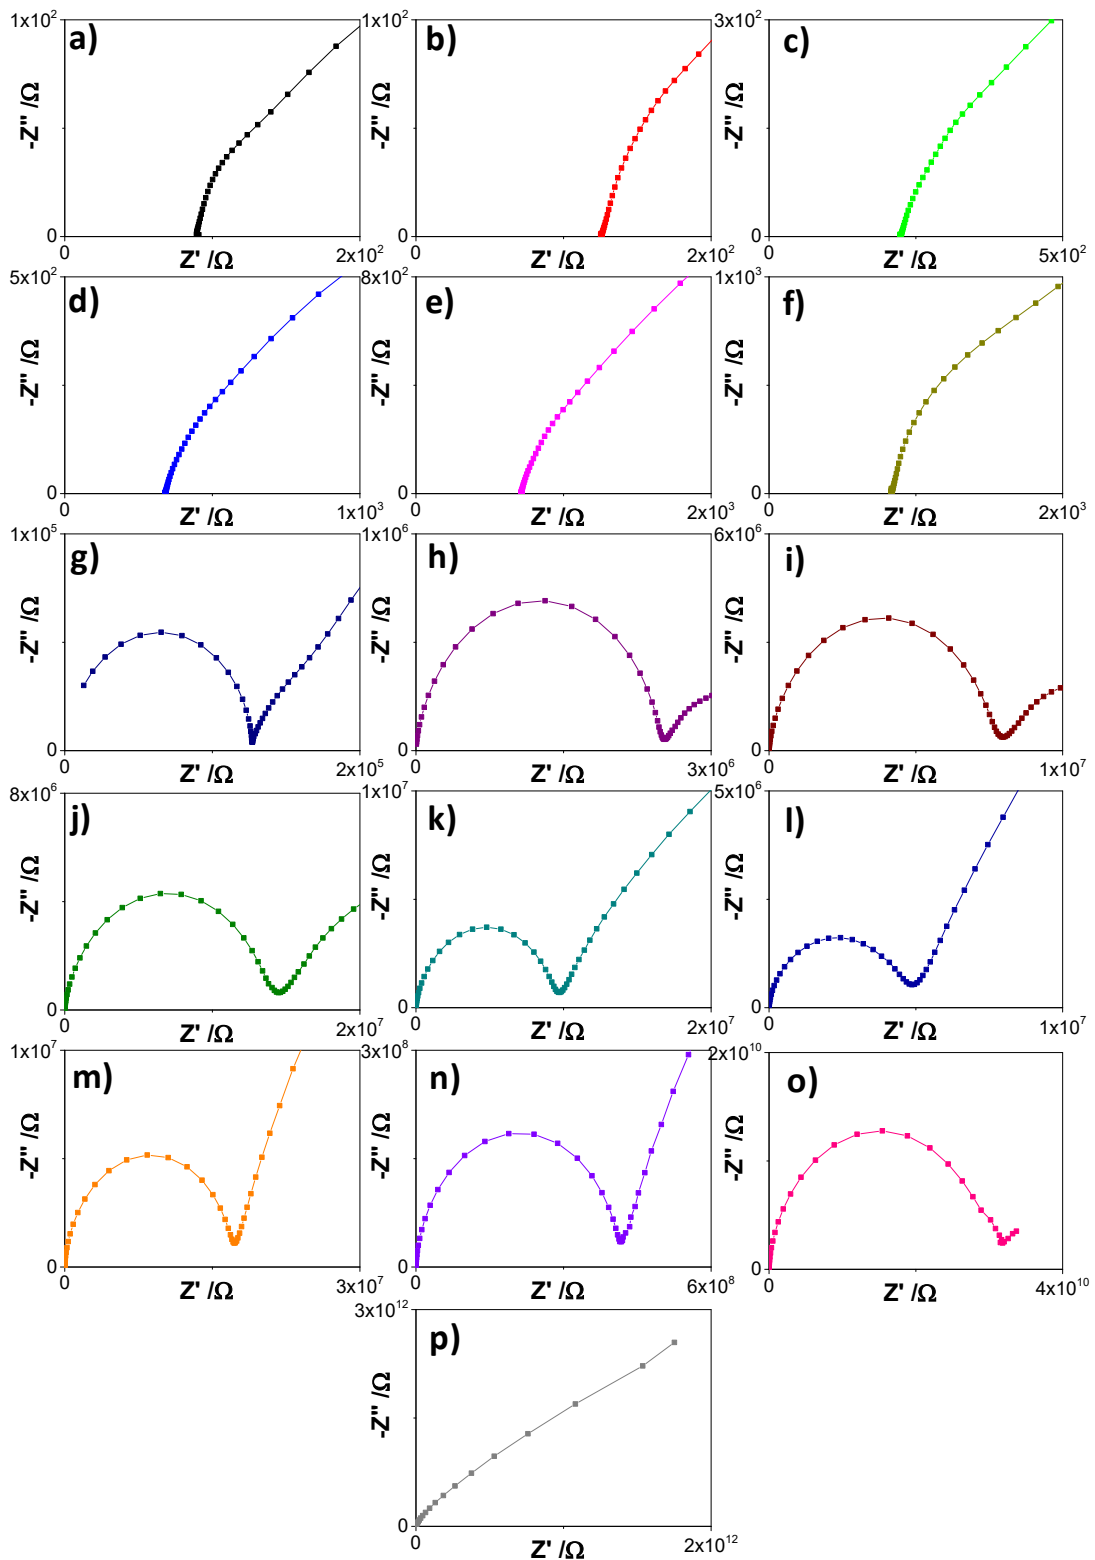

**Figure S6:** Nyquist plots of the impedance for the bulk EMIMCl recorded under 0% RH, at 323 K (a), 313 K (b), 303 K (c), 293 K (d), 283 K (e), 273 K (f), 263 K (g), 253 K (h), 243 K (i), 233 K (j), 223 K (k), 213 K (l), 203 K (m), 193 K (n), 183 K (o) and 173 K (p).

### Impedance measurements of the anhydrous MIL-101(Cr)-SO<sub>3</sub>H

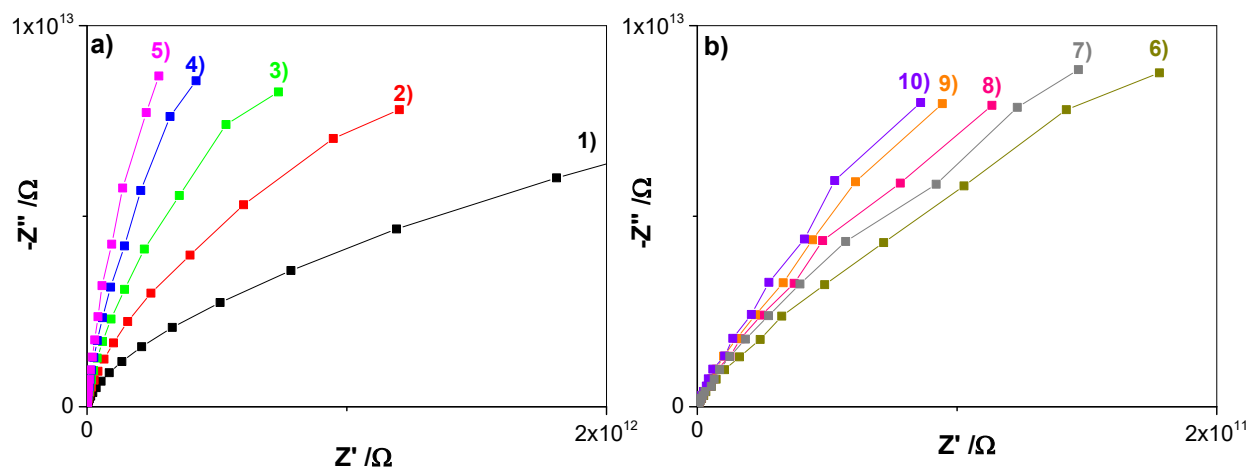

**Figure S7:** Nyquist plots of the impedance for the dehydrated MIL-101(Cr)-SO<sub>3</sub>H recorded under 0% RH, at 393 K (1), 383 K (2), 373 K (3), 363 K (4), 353 K (5), 343 K (6), 333 K (7), 323 K (8), 313 K (9) and 303 K (10).



Impedance measurements of the hydrated EMIM@MIL-101-SO<sub>3</sub>H for RH varying from 35 % to 80 %

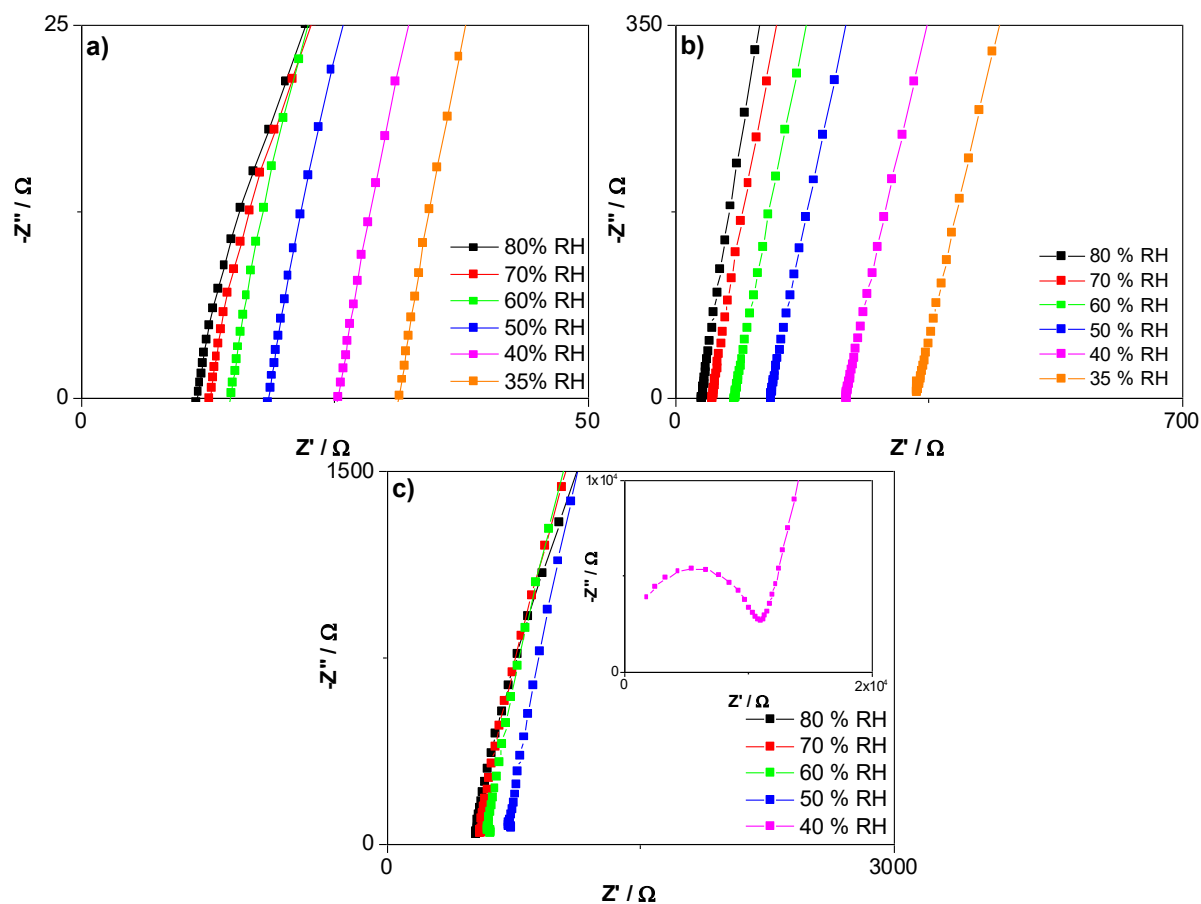

**Figure S8:** Nyquist plots of the impedance for EMIM@ MIL-101-SO<sub>3</sub>H recorded at 343 K (a) and 303 K (b) and for MIL-101(Cr)-SO<sub>3</sub>H recorded at 343 K (c) for RH varying from 35% to 80%.

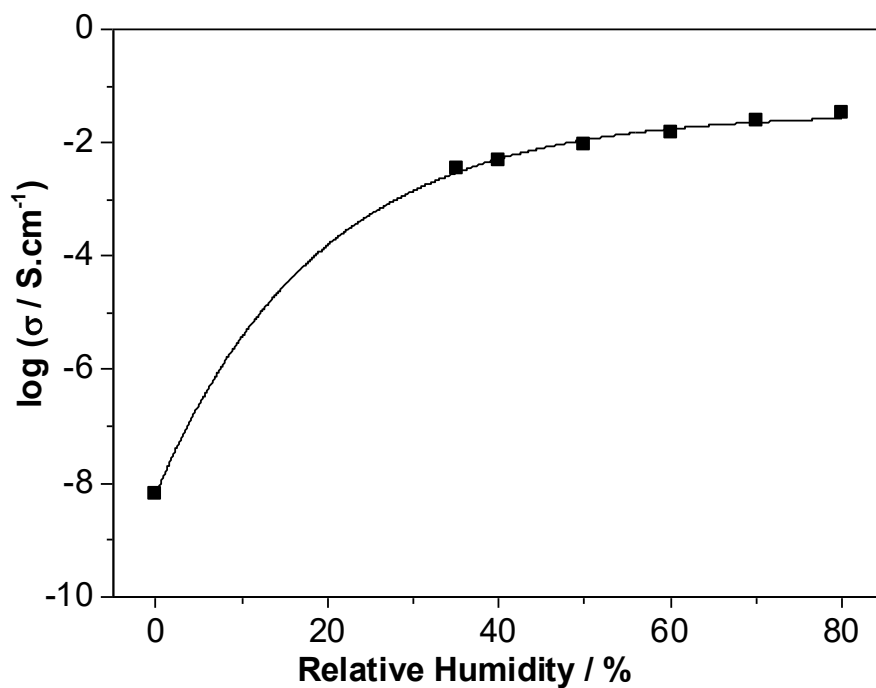

**Figure S9:** Humidity dependence of the conductivity for EMIM@MIL-101-SO<sub>3</sub>H recorded at 303 K. The exponential line is a guide for the eyes.

### Water sorption isotherm of EMIM@MIL-101-SO<sub>3</sub>H

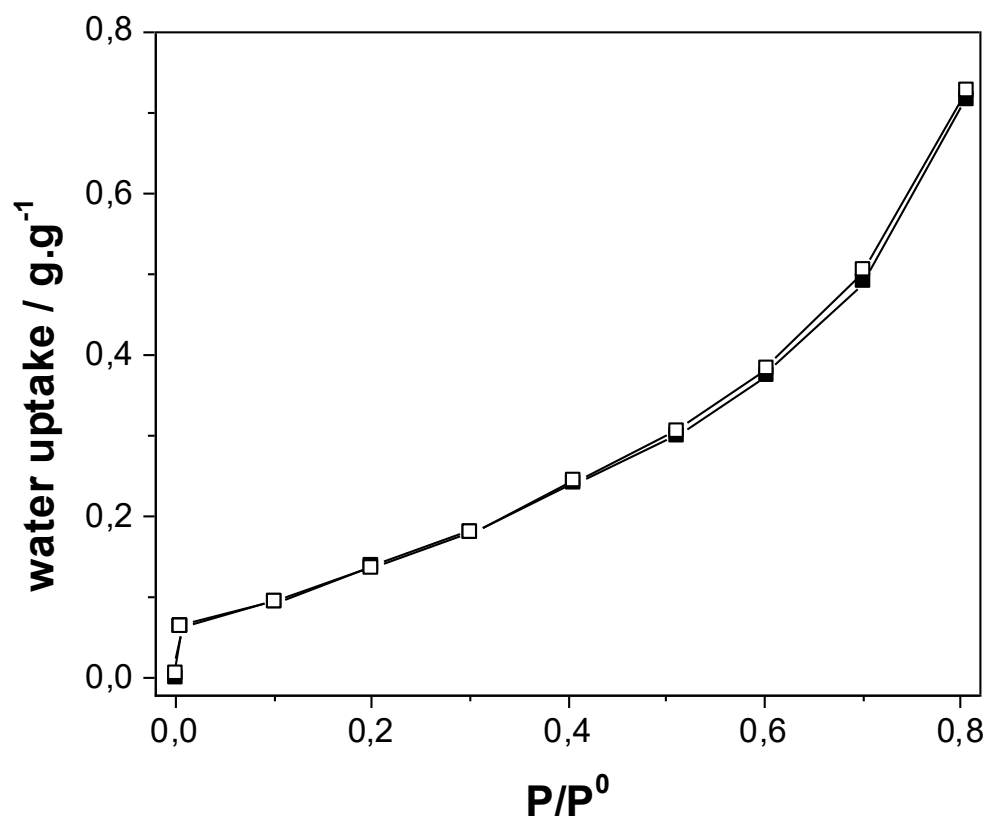

**Figure S10:** Water sorption isotherm of EMIM@MIL-101-SO<sub>3</sub>H recorded at 303 K. Full and empty squares refer to the adsorption and desorption branches, respectively.

**Additional impedance measurements**  
**Impedance measurements of the hydrated EMIM@MIL-101-SO<sub>3</sub>H**  
**and MIL-101(Cr)-SO<sub>3</sub>H at RH = 80 % for T varying from 343 K to 298 K**

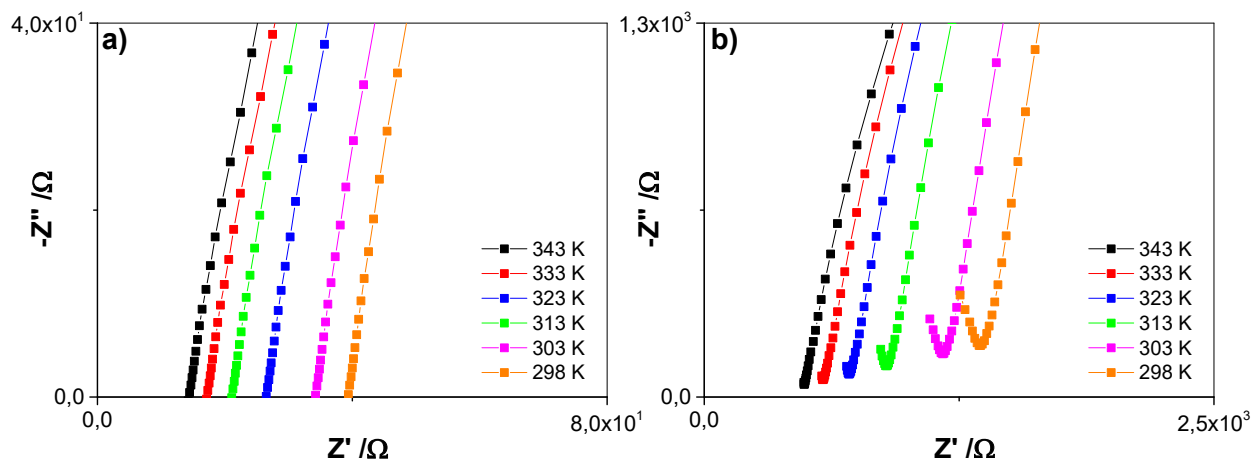

**Figure S11:** Nyquist plots of the impedance for EMIM@MIL-101-SO<sub>3</sub>H (a) and MIL-101(Cr)-SO<sub>3</sub>H (b) recorded under 80% RH, for T varying from 343 K to 298 K.

**Impedance measurements of the hydrated EMIM@MIL-101-SO<sub>3</sub>H recorded at RH = 80 % and T = 343 K**

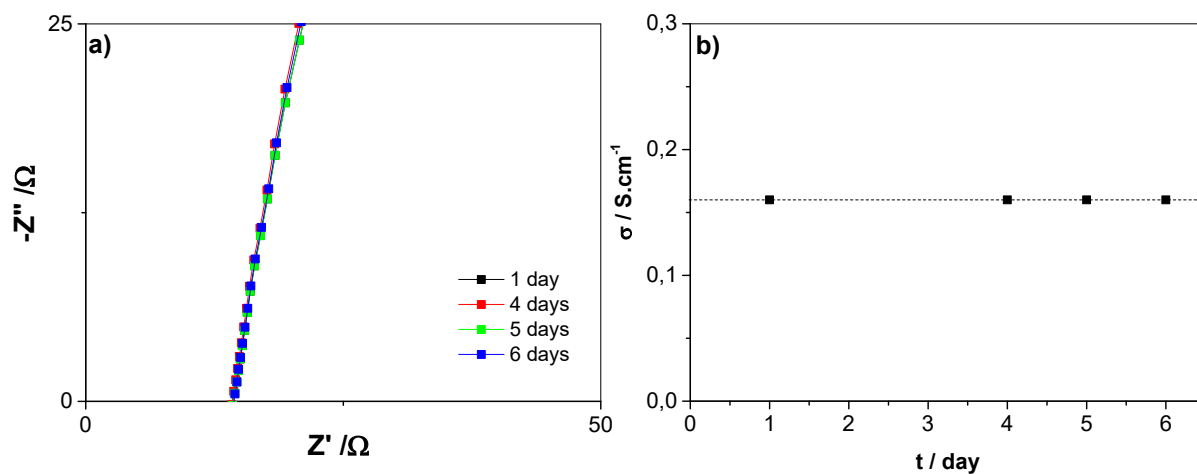

**Figure S12:** Time dependence of the conductivity of EMIM@MIL-101-SO<sub>3</sub>H recorded at 343 K under 80% RH.

**Table S3.** Conductivity values deduced from the Nyquist plots, for EMIMCl, MIL-101(Cr)-SO<sub>3</sub>H and EMIM@MIL-101-SO<sub>3</sub>H powders at different RH/T conditions. *l* and *S* are the sample thickness and surface.

| <b>Anhydrous EMIM@MIL-101-SO<sub>3</sub>H</b> <i>RH</i> = 0% ( <i>l</i> = 0.044 cm, <i>S</i> = 0.3631 cm <sup>2</sup> ) |                               |               |                               |                                                                                |                               |               |                               |
|-------------------------------------------------------------------------------------------------------------------------|-------------------------------|---------------|-------------------------------|--------------------------------------------------------------------------------|-------------------------------|---------------|-------------------------------|
| <i>T</i> / K                                                                                                            | $\sigma / S$ cm <sup>-1</sup> | <i>T</i> / K  | $\sigma / S$ cm <sup>-1</sup> | <i>T</i> / K                                                                   | $\sigma / S$ cm <sup>-1</sup> | <i>T</i> / K  | $\sigma / S$ cm <sup>-1</sup> |
| 473                                                                                                                     | 1.6 × 10 <sup>-3</sup>        | 463           | 7.2 × 10 <sup>-4</sup>        | 453                                                                            | 4.0 × 10 <sup>-4</sup>        | 443           | 3.0 × 10 <sup>-4</sup>        |
| 433                                                                                                                     | 2.0 × 10 <sup>-4</sup>        | 423           | 1.4 × 10 <sup>-4</sup>        | 413                                                                            | 9.8 × 10 <sup>-5</sup>        | 403           | 6.4 × 10 <sup>-5</sup>        |
| 393                                                                                                                     | 4.1 × 10 <sup>-5</sup>        | 383           | 2.4 × 10 <sup>-5</sup>        | 373                                                                            | 1.4 × 10 <sup>-5</sup>        | 363           | 7.4 × 10 <sup>-6</sup>        |
| 353                                                                                                                     | 3.5 × 10 <sup>-6</sup>        | 343           | 1.4 × 10 <sup>-6</sup>        | 333                                                                            | 5.1 × 10 <sup>-7</sup>        | 323           | 2.0 × 10 <sup>-7</sup>        |
| 313                                                                                                                     | 6.6 × 10 <sup>-8</sup>        | 303           | 1.5 × 10 <sup>-8</sup>        | 293                                                                            | 2.9 × 10 <sup>-9</sup>        | 283           | 4.8 × 10 <sup>-10</sup>       |
| 273                                                                                                                     | 6.0 × 10 <sup>-11</sup>       | 263           | 6.0 × 10 <sup>-12</sup>       | 253                                                                            | 5.1 × 10 <sup>-13</sup>       | 243           | 5.9 × 10 <sup>-14</sup>       |
| <b>Bulk EMIMCl</b> <i>RH</i> = 0% ( <i>l</i> = 0.098 cm, <i>S</i> = 0.3631 cm <sup>2</sup> )                            |                               |               |                               |                                                                                |                               |               |                               |
| <i>T</i> / K                                                                                                            | $\sigma / S$ cm <sup>-1</sup> | <i>T</i> / K  | $\sigma / S$ cm <sup>-1</sup> | <i>T</i> / K                                                                   | $\sigma / S$ cm <sup>-1</sup> | <i>T</i> / K  | $\sigma / S$ cm <sup>-1</sup> |
| 323                                                                                                                     | 3.0 × 10 <sup>-3</sup>        | 313           | 2.1 × 10 <sup>-3</sup>        | 303                                                                            | 1.2 × 10 <sup>-3</sup>        | 293           | 7.9 × 10 <sup>-4</sup>        |
| 283                                                                                                                     | 5.0 × 10 <sup>-4</sup>        | 273           | 3.2 × 10 <sup>-4</sup>        | 263                                                                            | 2.1 × 10 <sup>-6</sup>        | 253           | 1.4 × 10 <sup>-7</sup>        |
| 243                                                                                                                     | 2.8 × 10 <sup>-8</sup>        | 233           | 2.5 × 10 <sup>-8</sup>        | 223                                                                            | 2.8 × 10 <sup>-8</sup>        | 213           | 5.5 × 10 <sup>-8</sup>        |
| 203                                                                                                                     | 1.9 × 10 <sup>-8</sup>        | 193           | 6.5 × 10 <sup>-10</sup>       | 183                                                                            | 8.5 × 10 <sup>-12</sup>       |               |                               |
| <b>Hydrated EMIM@MIL-101-SO<sub>3</sub>H</b>                                                                            |                               |               |                               |                                                                                |                               |               |                               |
| <i>T</i> = 343 K<br>( <i>l</i> = 0.186 cm, <i>S</i> = 0.1256 cm <sup>2</sup> )                                          |                               |               |                               | <i>T</i> = 298 K<br>( <i>l</i> = 0.148 cm, <i>S</i> = 0.1256 cm <sup>2</sup> ) |                               |               |                               |
| <i>RH</i> / %                                                                                                           | $\sigma / S$ cm <sup>-1</sup> | <i>RH</i> / % | $\sigma / S$ cm <sup>-1</sup> | <i>RH</i> / %                                                                  | $\sigma / S$ cm <sup>-1</sup> | <i>RH</i> / % | $\sigma / S$ cm <sup>-1</sup> |
| 80                                                                                                                      | 1.4 × 10 <sup>-1</sup>        | 70            | 1.2 × 10 <sup>-1</sup>        | 80                                                                             | 3.2 × 10 <sup>-2</sup>        | 70            | 2.3 × 10 <sup>-2</sup>        |
| 60                                                                                                                      | 1.0 × 10 <sup>-1</sup>        | 50            | 8.4 × 10 <sup>-2</sup>        | 60                                                                             | 1.4 × 10 <sup>-2</sup>        | 50            | 9.0 × 10 <sup>-3</sup>        |
| 40                                                                                                                      | 6.0 × 10 <sup>-2</sup>        | 35            | 4.8 × 10 <sup>-2</sup>        | 40                                                                             | 5.0 × 10 <sup>-3</sup>        | 35            | 3.5 × 10 <sup>-3</sup>        |
| <b>Hydrated MIL-101(Cr)-SO<sub>3</sub>H</b> <i>T</i> = 343 K ( <i>l</i> = 0.376 cm, <i>S</i> = 0.1256 cm <sup>2</sup> ) |                               |               |                               |                                                                                |                               |               |                               |
| <i>RH</i> / %                                                                                                           | $\sigma / S$ cm <sup>-1</sup> | <i>RH</i> / % | $\sigma / S$ cm <sup>-1</sup> | <i>RH</i> / %                                                                  | $\sigma / S$ cm <sup>-1</sup> | <i>RH</i> / % | $\sigma / S$ cm <sup>-1</sup> |
| 80                                                                                                                      | 5.6 × 10 <sup>-3</sup>        | 70            | 5.4 × 10 <sup>-3</sup>        | 60                                                                             | 5.0 × 10 <sup>-3</sup>        | 50            | 4.2 × 10 <sup>-3</sup>        |
| 40                                                                                                                      | 2.7 × 10 <sup>-4</sup>        |               |                               |                                                                                |                               |               |                               |
| <b>Hydrated EMIM@MIL-101-SO<sub>3</sub>H</b> <i>RH</i> = 80% ( <i>l</i> = 0.270 cm, <i>S</i> = 0.1256 cm <sup>2</sup> ) |                               |               |                               |                                                                                |                               |               |                               |
| <i>T</i> / K                                                                                                            | $\sigma / S$ cm <sup>-1</sup> | <i>T</i> / K  | $\sigma / S$ cm <sup>-1</sup> | <i>T</i> / K                                                                   | $\sigma / S$ cm <sup>-1</sup> | <i>T</i> / K  | $\sigma / S$ cm <sup>-1</sup> |
| 343                                                                                                                     | 1.4 × 10 <sup>-1</sup>        | 333           | 1.3 × 10 <sup>-1</sup>        | 323                                                                            | 1.0 × 10 <sup>-1</sup>        | 313           | 8.3 × 10 <sup>-2</sup>        |
| 303                                                                                                                     | 6.4 × 10 <sup>-2</sup>        | 298           | 5.5 × 10 <sup>-2</sup>        |                                                                                |                               |               |                               |
| <b>Hydrated MIL-101(Cr)-SO<sub>3</sub>H</b> <i>RH</i> = 80% ( <i>l</i> = 0.313 cm, <i>S</i> = 0.1256 cm <sup>2</sup> )  |                               |               |                               |                                                                                |                               |               |                               |
| <i>T</i> / K                                                                                                            | $\sigma / S$ cm <sup>-1</sup> | <i>T</i> / K  | $\sigma / S$ cm <sup>-1</sup> | <i>T</i> / K                                                                   | $\sigma / S$ cm <sup>-1</sup> | <i>T</i> / K  | $\sigma / S$ cm <sup>-1</sup> |
| 343                                                                                                                     | 5.1 × 10 <sup>-3</sup>        | 333           | 4.3 × 10 <sup>-3</sup>        | 323                                                                            | 3.5 × 10 <sup>-3</sup>        | 313           | 2.8 × 10 <sup>-3</sup>        |
| 303                                                                                                                     | 2.1 × 10 <sup>-3</sup>        | 298           | 1.8 × 10 <sup>-3</sup>        |                                                                                |                               |               |                               |
